# Supplementary material for: Singlet-oxygen generated by a metal–organic framework for electrochemical biosensing
Source: Royal Society of Chemistry journal article supplement (doi:10.1039/d1tb00913c), 2021-01-01
Supplement: d1tb00913c1.pdf [file d1tb00913c1.pdf]

## Supplementary Information

### **Singlet-oxygen generated by metal-organic framework for electrochemical biosensing**

Pinghua Ling,\* Shan Cheng, Nuo Chen and Feng Gao\*

*Laboratory of Functionalized Molecular Solids, Ministry of Education, Anhui Key  
Laboratory of Chemo/Biosensing, College of Chemistry and Materials Science, Anhui  
Normal University, Wuhu 241002, China.*

\* Corresponding author. Phone/fax: +86-553-3937137. E-mail: phling@ahnu.edu.cn  
(P. Ling); fgao@ahnu.edu (F. Gao)

## Supporting Figures

### The elemental mappings of Zn-ZnMOF

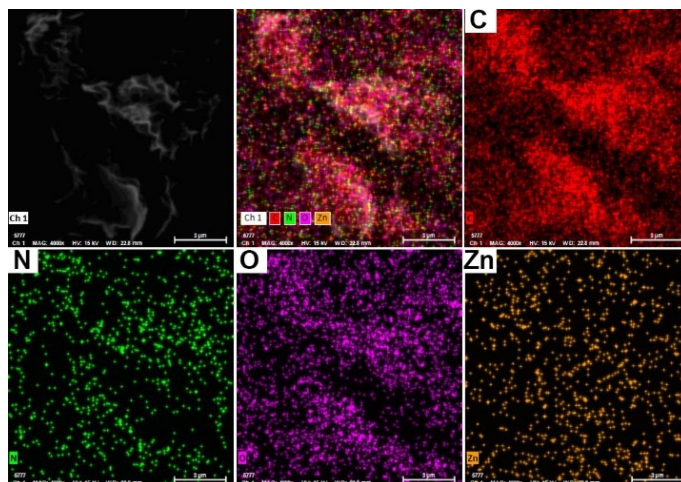

**Fig. S1.** Elemental mappings of C, N, O and Zn in Zn-ZnMOF.

### The EDX spectrum of Zn-ZnMOF

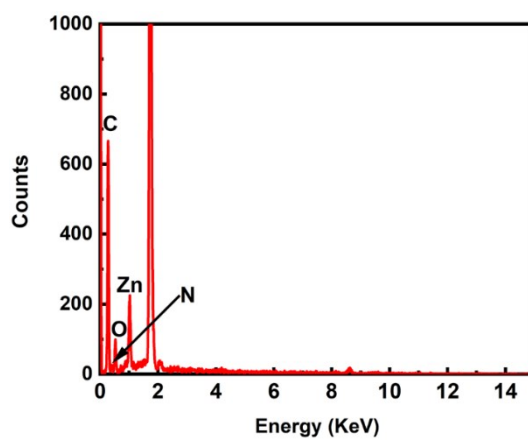

**Fig. S2.** EDX spectrum of Zn-ZnMOF.

## The FT-IR of TCPP(Zn) and Zn-ZnMOF

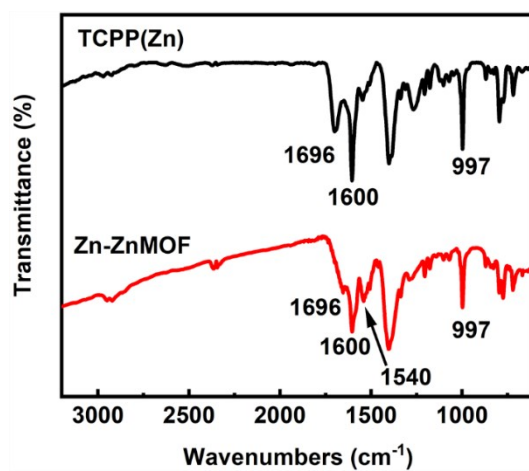

Fig. S3. FT-IR analysis of TCPP(Zn) and Zn-ZnMOF.

## The XPS of Zn 2p and O 1s in Zn-ZnMOF

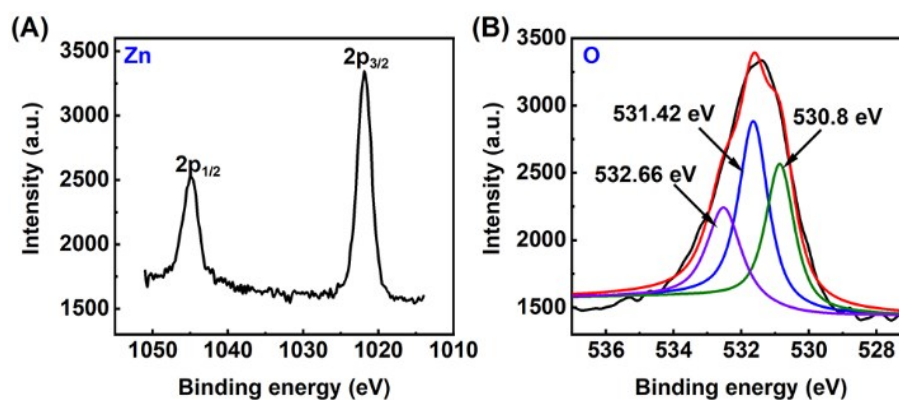

Fig. S4. (A) Zn 2p and O 1s peaks from the XPS spectra of Zn-ZnMOF.

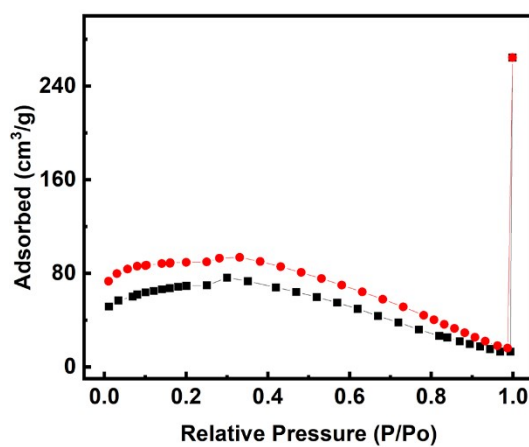

Fig. S5. N<sub>2</sub> adsorption isotherm of Zn-ZnMOF.

## The ABDA absorption spectra as a function of time in the presence of TCPP(Zn)

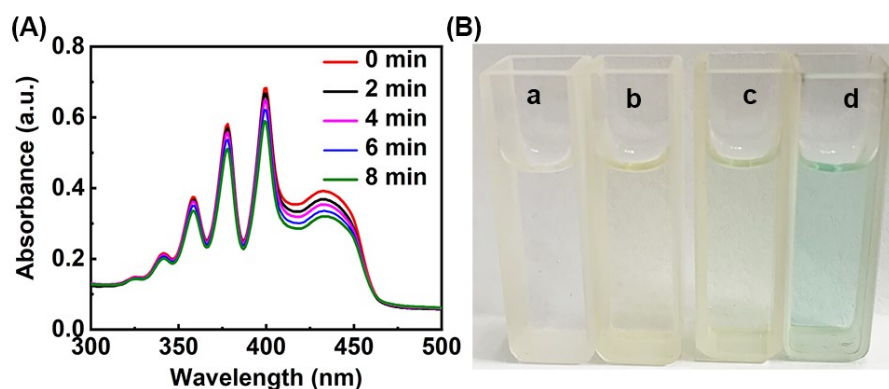

**Fig. S6.** (A) ABDA absorption spectra as a function of irradiation time of TCPP(Zn) in 0.1 M PBS (pH = 7.4). (B) Photo of tubes with different reaction system: TMB + 420 nm illumination (a), TCPP(Zn) + 420 nm illumination (b), TMB-TCPP(Zn) (c), and TMB-TCPP(Zn) + 420 nm illumination (d).

## The Cyclic voltammograms of bare ITO electrode and Zn-ZnMOF/ITO electrode

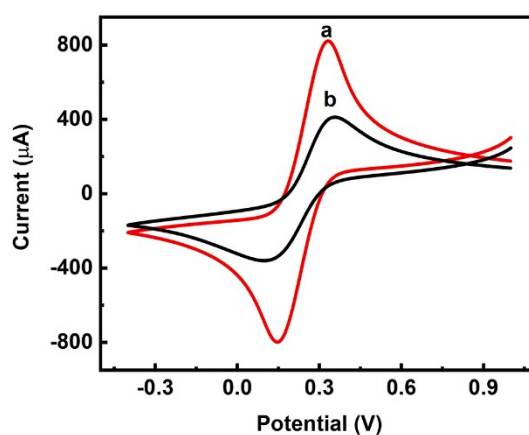

**Fig. S7.** Cyclic voltammograms of bare ITO electrode (a) and Zn-ZnMOF/ITO electrode (b) in 5 mM  $K_3[Fe(CN)_6]/K_4[Fe(CN)_6]$  in 0.1 M PBS (pH 7.4) containing 0.1 M KCl at scan rate of  $50 \text{ mV s}^{-1}$ .

## The EIS of bare ITO electrode and Zn-ZnMOF/ITO electrode

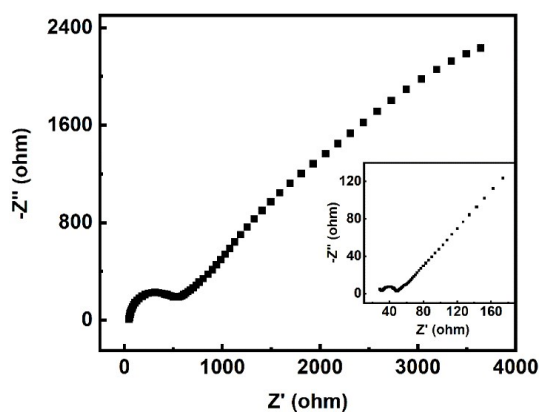

**Fig. S8.** EIS of Zn-ZnMOF/ITO electrode (inset: bare ITO electrode) in 5 mM  $K_3[Fe(CN)_6]/K_4[Fe(CN)_6]$  in 0.1 M PBS (pH 7.4) containing 0.1 M KCl.

## The effect of potential for photoelectrochemical biosensor

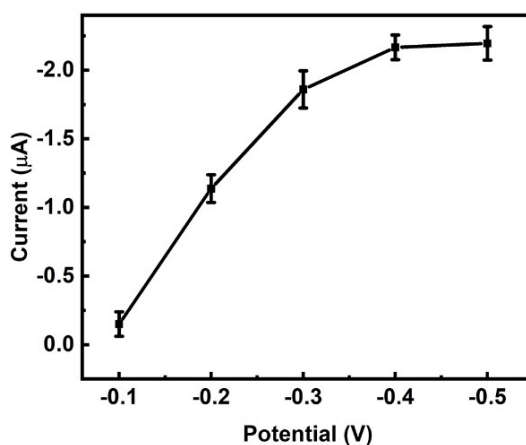

**Fig. S9.** Effects of potential on current response in the presence of 40 μM HQ in 0.1 M pH 7.4 PBS with 420 light illumination.

## The Performance of Photoelectrochemical Biosensor

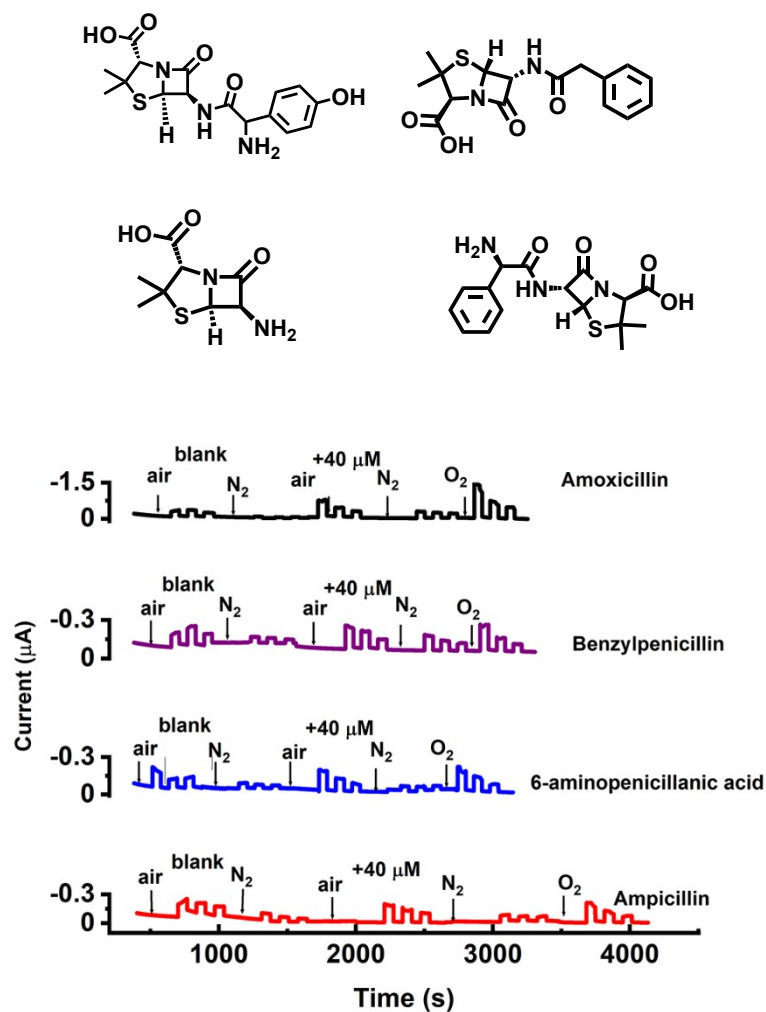

**Fig. S10.** Amperometry measurements at Zn-ZnMOF/ITO electrode in pure buffer and in the presence of 40  $\mu\text{M}$  amoxicillin, 40  $\mu\text{M}$  ampicillin, 40  $\mu\text{M}$  benzylpenicillin and 40  $\mu\text{M}$  6-aminopenicillanic acid at -0.4 V in 0.1 M pH 7.4 PBS with 420 nm light illumination.

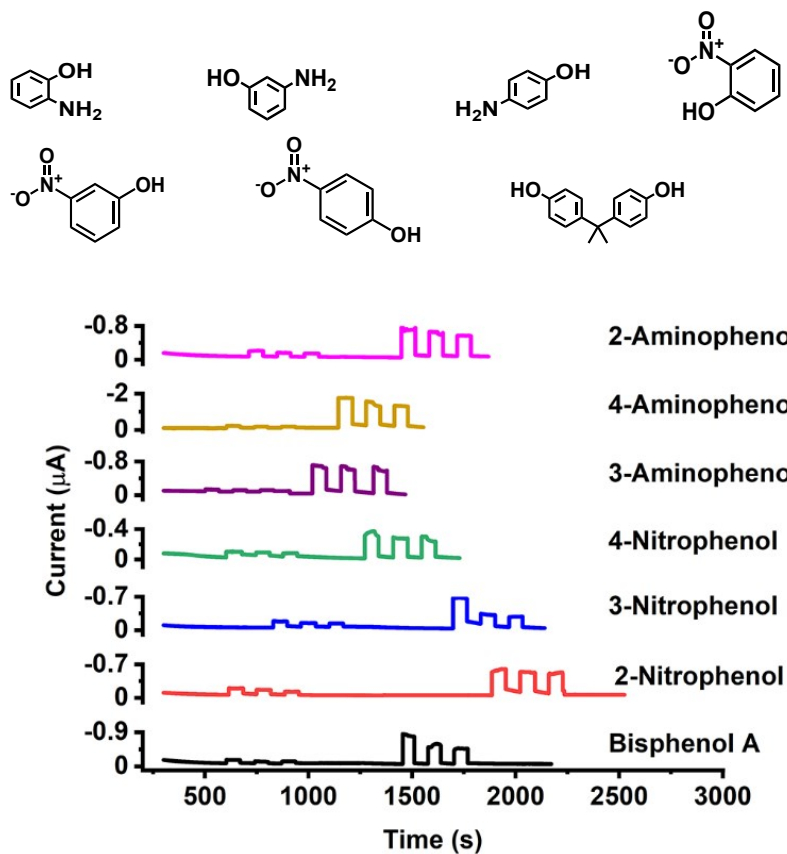

**Fig. S11.** The structure of 2-aminophenol, 3-aminophenol, 4-aminophenol, 2-nitrophenol, 3-nitrophenol, 4-nitrophenol, and bisphenol A and amperometry measurements at Zn-ZnMOF/ITO electrode in pure buffer and in the presence of 40  $\mu\text{M}$  3-nitrophenol, 40  $\mu\text{M}$  2-nitrophenol, 40  $\mu\text{M}$  4-nitrophenol, 40  $\mu\text{M}$  2-aminophenol, 40  $\mu\text{M}$  3-aminophenol, 40  $\mu\text{M}$  4-aminophenol and 40  $\mu\text{M}$  bisphenol A at -0.4 V in 0.1 M pH 7.4 PBS with 420 light irradiation.

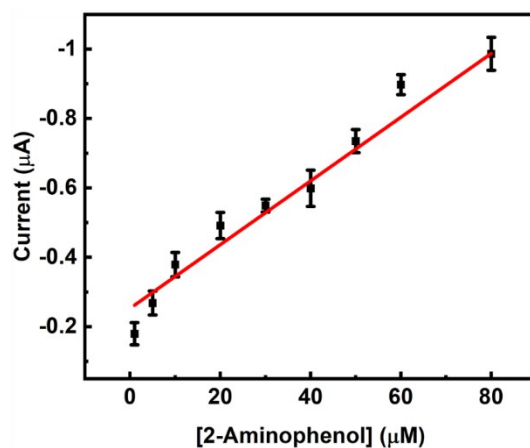

**Fig. S12.** Calibration curve of current intensity vs different concentration of 2-Aminophenol at -0.4 V in 0.1 M pH 7.4 PBS with 420 nm light irradiation.

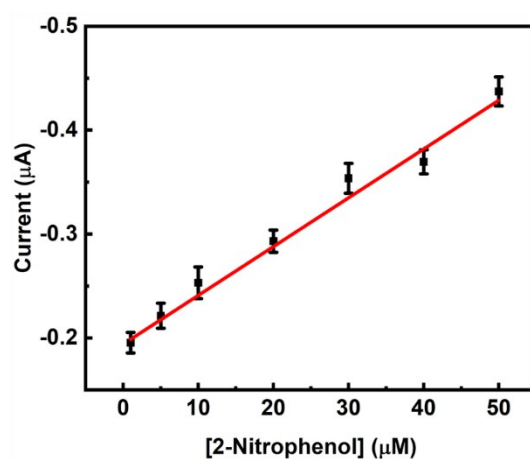

**Fig. S13.** Calibration curve of current intensity vs different concentration of 2-Nitrophenol at -0.4 V in 0.1 M pH 7.4 PBS with 420 nm light irradiation.



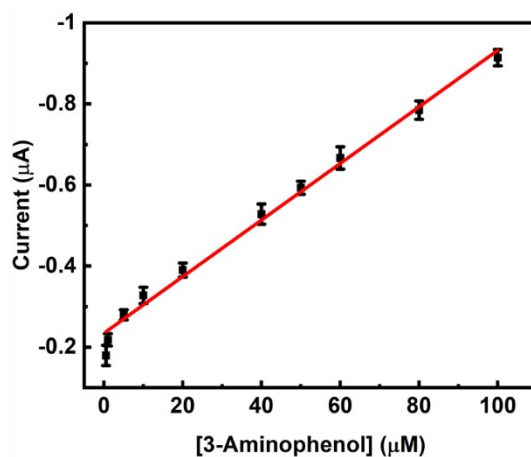

**Fig. S14.** Calibration curve of current intensity vs different concentration of 3-Aminophenol at -0.4 V in 0.1 M pH 7.4 PBS with 420 nm light irradiation.

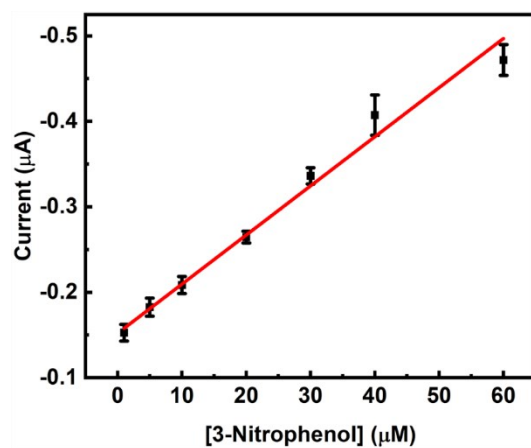

**Fig. S15.** Calibration curve of current intensity vs different concentration of 3-Nitrophenol at -0.4 V in 0.1 M pH 7.4 PBS with 420 nm light irradiation.

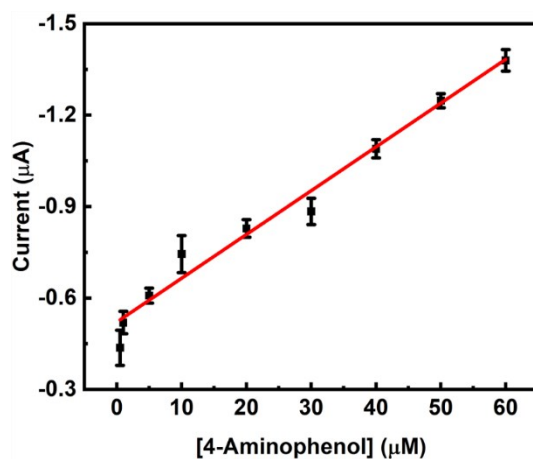

**Fig. S16.** Calibration curve of current intensity vs different concentration of 4-Aminophenol at -0.4 V in 0.1 M pH 7.4 PBS with 420 nm light irradiation.

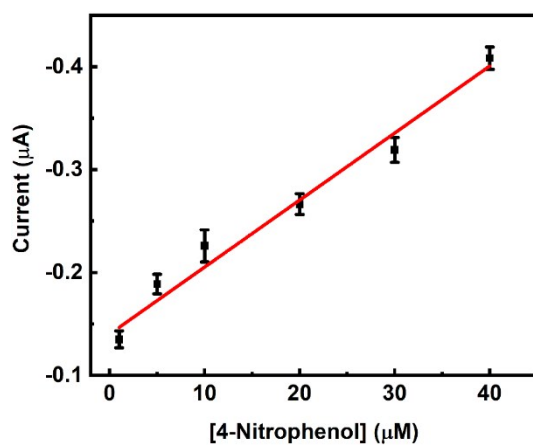

**Fig. S17.** Calibration curve of current intensity vs different concentration of 4-Nitrophenol at -0.4 V in 0.1 M pH 7.4 PBS with 420 nm light irradiation.

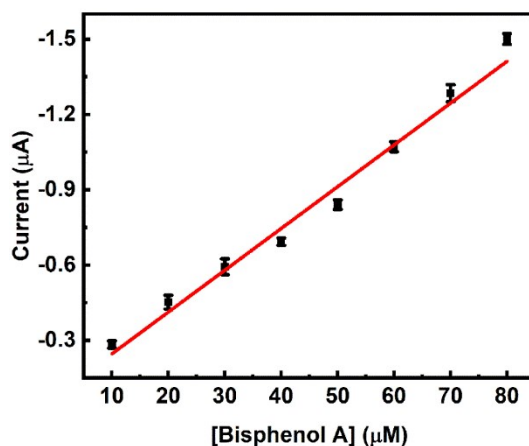

**Fig. S18.** Calibration curve of current intensity vs different concentration of Bisphenol A at -0.4 V in 0.1 M pH 7.4 PBS with 420 nm light irradiation.

Table S1. Comparison of the detection limit of hydroquinone (HQ) between the proposed method and other reported detection methods.

| Electrode                         | Technique   | Detection limit (µM) | Refs      |
|-----------------------------------|-------------|----------------------|-----------|
| Graphene-PANI/Tyr/Nafion/GCE      | LSV         | 200                  | 1         |
| GCE                               | CV          | 1.75                 | 2         |
| graphitized mesoporous carbon/GCE | DPV         | 0.91                 | 3         |
| LDH/GCE                           | DPV         | 2.6                  | 4         |
| CPE                               | SWV         | 2                    | 5         |
| Poly/GCE                          | LSV         | 3.91                 | 6         |
| Zn-ZnMOF/ITO                      | amperometry | 0.8                  | This work |

### Reference

1. K. Chen, Z.L. Zhang, Y.M. Liang and W. Liu, *Sensors*, 2013, 13, 6204-6216.
2. L.Y. Jiang, I. Santiago and J. Foord, *Commun. Chem.*, 2018, DOI: 10.1038/s42004-018-0045-8.
3. R. Thangaraj, N. Manjula, and A.S. Kumar, *Anal. Methods*, 2012, 4, 2922-2928.

4. M. Kahl and T. D. Golden, *Electroanalysis*, 2014, 26, 1664-1670.
5. S.C. Fernandes, I.R.W.Z. Oliveira and I.C. Vieira, *Enzyme Microb. Technol.*, 2007, 40, 661-668.
6. D.P. Santos, M.F. Bergamini, A.G. Fogg and M.V.B. Zanoni, *Microchim. Acta*, 2005, 151, 127-134.
